# Supplementary material for: Advanced portable micro-SORS prototype coupled with SERDS for heritage science
Source: Royal Society of Chemistry journal article supplement (doi:10.1039/d3an02215c), 2024-01-01
Supplement: d3an02215c1.pdf [file d3an02215c1.pdf]

## Supporting Information

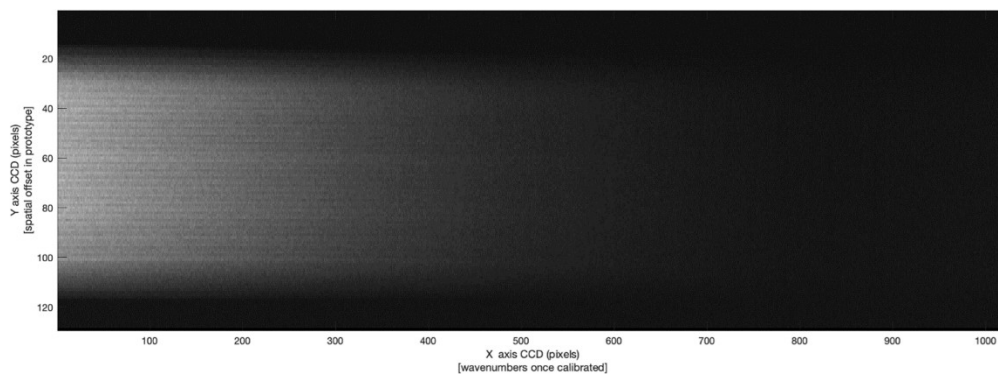

Figure S1. CCD image collected using the developed prototype from white-light illumination on a sample, showing the single fibres aligned on the Y axis of the CCD. The fibres are observed as the Y axis spatial info are conserved on the CCD image, while on the X axis wavelengths are dispersed showing a broad spectrum from the illumination used.
